# Supplementary material for: Hydrogen-bonded organic frameworks with extended conjugate systems for boosted photocatalytic degradation
Source: Royal Society of Chemistry journal article supplement (doi:10.1039/d4nj00610k), 2024-01-01
Supplement: d4nj00610k1.pdf [file d4nj00610k1.pdf]

## Hydrogen-bonded organic framework with the extended conjugate system for boosted photocatalytic degradation

Xiaojuan Bai<sup>\*a,b</sup>, YiLin Xin<sup>a,b</sup>, Tianqi Jia<sup>a,b</sup>, Linlong Guo<sup>a,b</sup>, Wei Song<sup>a,b</sup>, Derek Hao<sup>\*c</sup>

<sup>a</sup>Beijing Energy Conservation & Sustainable Urban and Rural Development Provincial and Ministry Co-construction Collaboration Innovation Center, Beijing University of Civil Engineering and Architecture, Beijing, 100044, China.

<sup>b</sup>Key Laboratory of Urban Stormwater System and Water Environment, (Beijing University of Civil Engineering and Architecture), Ministry of Education, Beijing 100044, China. E-mail: baixiaojuan@bucea.edu.cn; heixia.1986@163.com

<sup>c</sup>School of Science, RMIT University, Melbourne, VIC 3000, Australia, haoqiangderek@gmail.com

### Section S1. Chemicals and materials

All chemical reagents applied in this paper are of analytical purity.

1,2,4-Benzenetricarboxylic anhydride (C<sub>9</sub>H<sub>4</sub>O<sub>5</sub>, 99.8%, Aladdin), urea (H<sub>2</sub>NCONH<sub>2</sub>, 99%, Sinopharm), ammonium molybdate tetrahydrate ((NH<sub>4</sub>)<sub>6</sub>Mo<sub>7</sub>O<sub>24</sub>·4H<sub>2</sub>O, AR, Sinopharm), cobalt(II) chloride hexahydrate (CoCl<sub>2</sub>·6H<sub>2</sub>O, AR, Sinopharm), hydrochloric acid (HCl, AR, Sinopharm), sodium hydroxide (NaOH, AR, Sinopharm), methanol (CH<sub>3</sub>OH, HPLC eluent, 99.8%, Macklin), formate (CH<sub>2</sub>O<sub>2</sub>, 98%, Macklin), ethanol (CH<sub>3</sub>CH<sub>2</sub>OH, 95%, Aladdin), tert-Butanol (C<sub>4</sub>H<sub>10</sub>O, AR, Sinopharm), p-benzoquinone (C<sub>6</sub>H<sub>4</sub>O<sub>2</sub>, AR, Macklin), ethylenediamine tetraacetic acid disodium salt (C<sub>10</sub>H<sub>14</sub>N<sub>2</sub>O<sub>8</sub>Na<sub>2</sub>·2H<sub>2</sub>O, AR, Sinopharm), sulfamethoxazole (C<sub>10</sub>H<sub>11</sub>N<sub>3</sub>O<sub>3</sub>S, 98%, Aladdin). Sodium hydroxide (NaOH, 97%, Aladdin), Hydrochloric acid (HCl, 37%, Aladdin).

## Section S2. Photocatalytic performance test

The detection wavelength was 270 nm, and the removal rate of SMX was calculated as follows:

$$\alpha = ((C_0 / C_t) / C_0) * 100\% \quad (1)$$

where  $\alpha$  represents the degradation rate of SMX;  $C_0$  is the concentration of sulfamethoxazole when the adsorption-desorption equilibrium was reached in the dark;  $C_t$  is the concentration of sulfamethoxazole at the time  $t$  of light. LC-MS was recorded on Ultimate 3000 UHPLC - Q Exactive liquid-mass spectrometer (Thermo Scientific, US), consisting of a Dionex Ultimate 3000 UHPLC chromatography. Separation was accomplished using an Eclipse Plus C18 column ( $4.6 \times 100$  mm). Elution was performed at a flow rate of  $0.3 \text{ mL min}^{-1}$  with 0.1 vol% formic acid aqueous solution as eluent A and ethyl hydrazine as eluent B. The separation of the analytes was achieved by a mixture solution with 80.0 vol% eluent A and 20.0 vol% eluent B, injected volume of  $10.0 \mu\text{l}$ . Mass spectra analysis was operated in positive mode using a HESI source, and the mass analyzer was operated in full scan mode ( $m/z$  range 200–600).

## Section S3. Electrochemical experiment details

The photocurrent measurement, Mott-Schottky (MS) plots, and Electrochemical impedance spectroscopy (EIS) were conducted on a CHI 660B electrochemical system (Shanghai, China) using a standard three-electrode cell with a working electrode, a platinum wire counter electrode,

and a standard calomel electrode (SCE) reference electrode. The electrolyte solution used was Na<sub>2</sub>SO<sub>4</sub> (1 M). The working electrode was prepared according to the following process. Five milligrams of the as-prepared sample were dispersed in 1 mL of H<sub>2</sub>O, and the resulting mixture was sonicated for 30 min before drop-casting onto a 10 mm × 20 mm indium tin oxide (ITO) glass electrode. Subsequently, the electrode was annealed at 200 °C for 300 min. Visible light irradiation was provided by MVL-210 with a UV cutoff filter. Electrochemical impedance spectroscopy (EIS) was applied to the electrode over the frequency range of 0.05 to 1 × 10<sup>5</sup> Hz with a sinusoidal ac perturbation of 5 mV.

#### **Section S4. Calculation of the apparent rate constants**

$$\ln(C_t / C_0) = -K_{\text{obs}} t \quad (2)$$

Where C<sub>0</sub> and C<sub>t</sub> represent the SMX concentration at the initial (t=0) and time t.

**Table S1. Apparent reaction rate constants of CoPcTc and its HOF material to SMX in water under visible light irradiation**

| Catalysts  | K <sub>obs</sub> (min <sup>-1</sup> ) | 1 / K <sub>obs</sub> (min) | R <sup>2</sup> |
|------------|---------------------------------------|----------------------------|----------------|
| CoPcTc     | 0.00886                               | 112.86                     | 0.99693        |
| HOF-CoPcTc | 0.0198                                | 50.5                       | 0.9999         |

**Table S2. Chemical formulas and relative molecular mass of intermediate products.**

| ID  | Chemical Formula      | m/z | Proposed structure                                                                  |
|-----|-----------------------|-----|-------------------------------------------------------------------------------------|
| SMX |                       |     |                                                                                     |
| I   | $C_6H_7NO_3S$         | 172 | 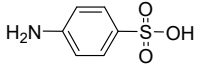 |
| II  | $C_6H_6O_3S$          | 159 |  |
| III | $C_4H_6N_2O$          | 99  |  |
| IV  | $C_4H_4N_2O_3$        | 128 |  |
| V   | $C_{10}H_{11}N_3O_3S$ | 254 |  |
| VI  | $C_7H_7N_3O_2$        | 199 |  |

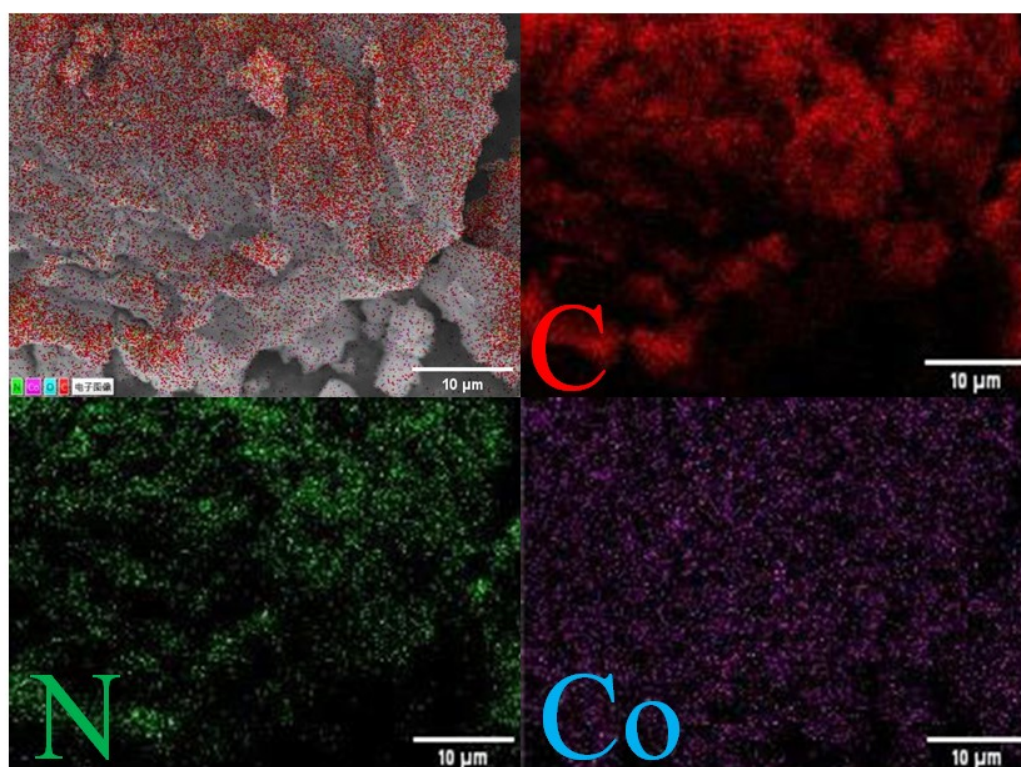

**Figure S1.** SEM-EDS analysis of CoPcTc.

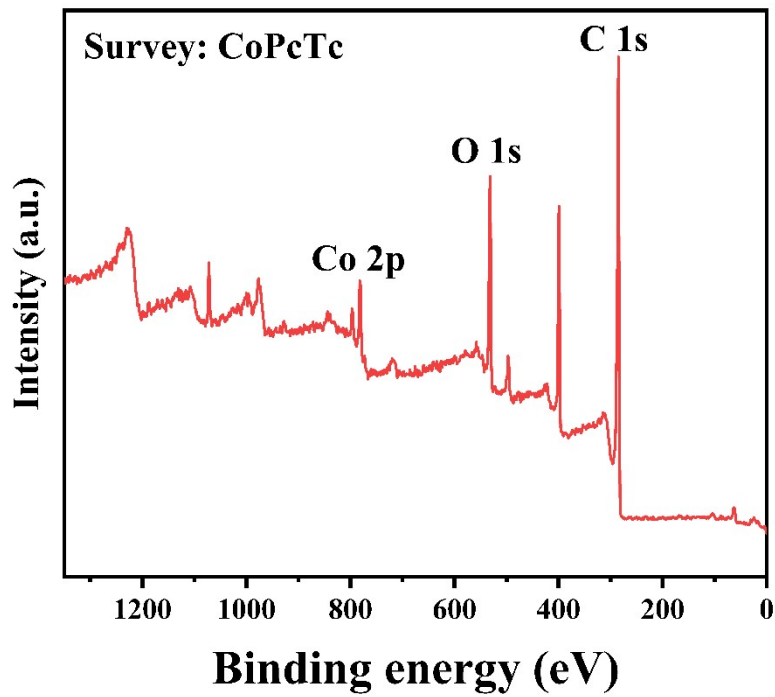

(a)

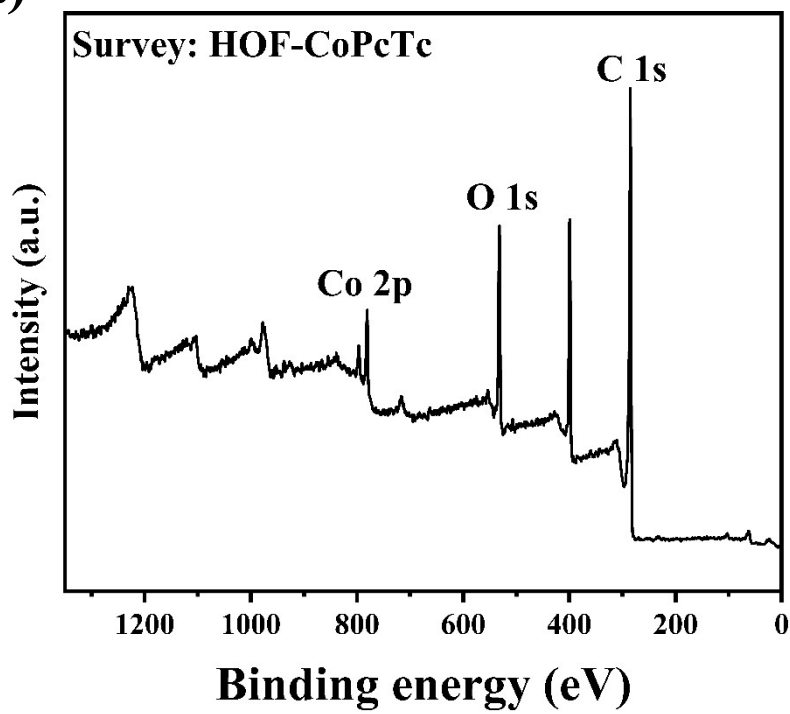

(b)

Figure S2. XPS survey spectra of CoPcTc(a) and HOF-CoPcTc (b).

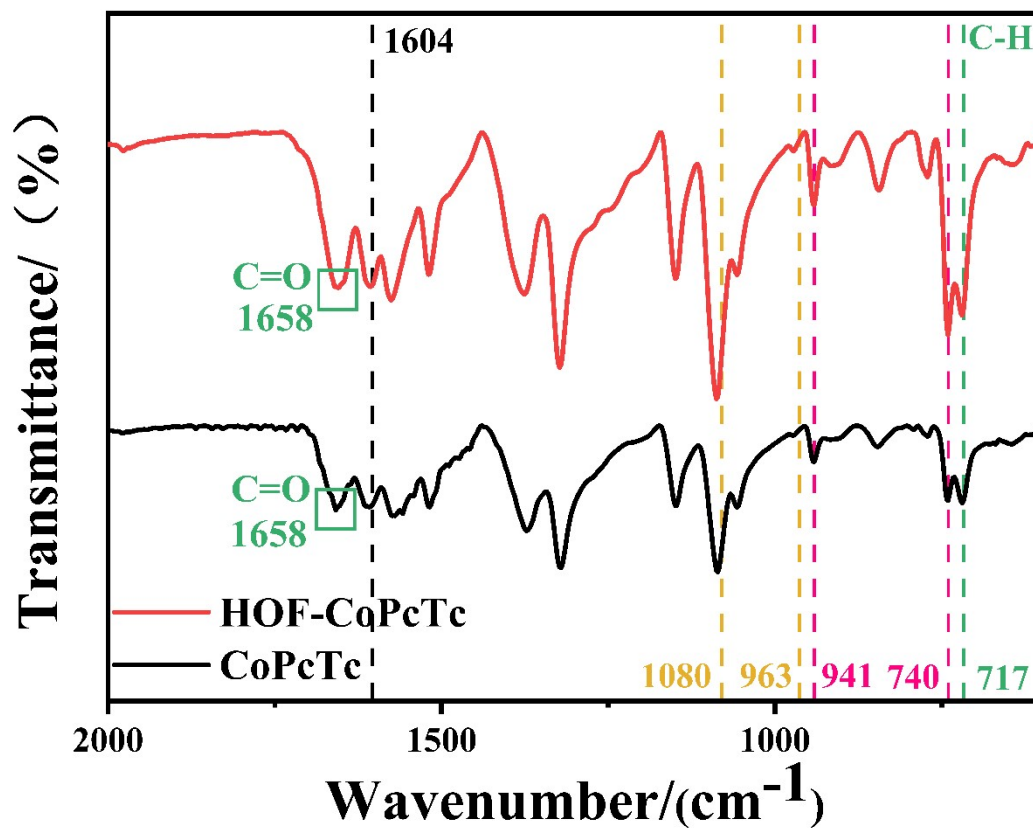

Figure S3. Enlarged view of FT-IR spectra.

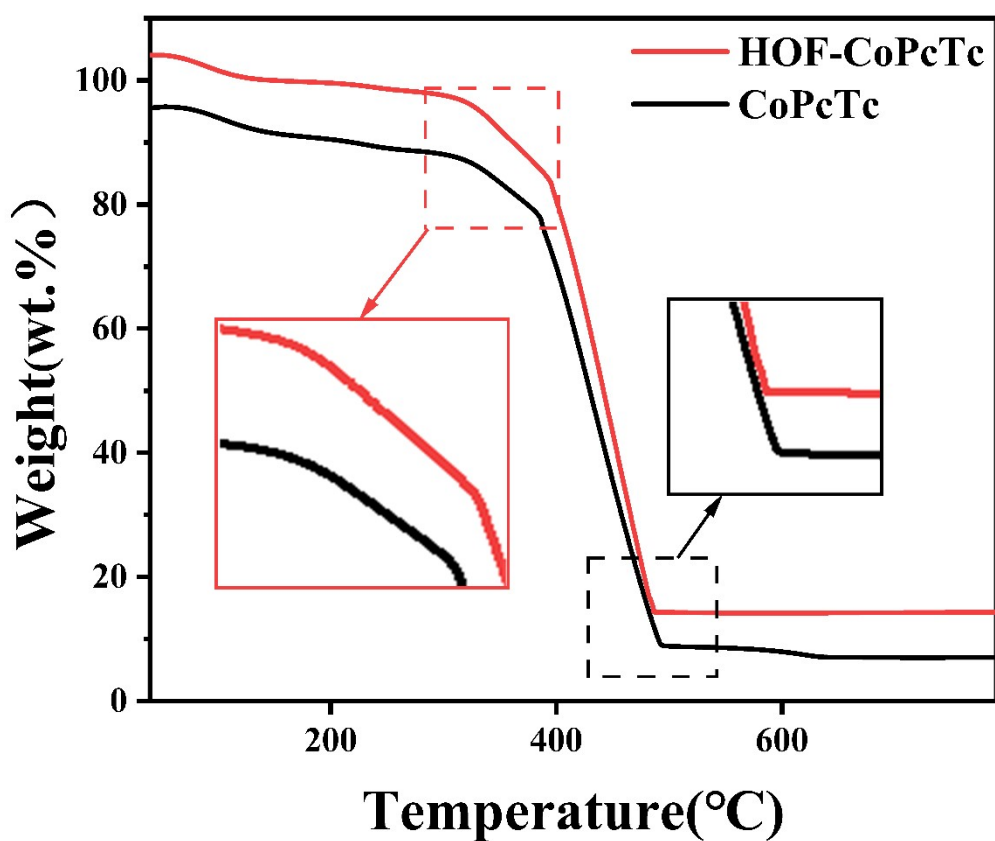

**Figure S4.** Enlarged view of TGA curves.

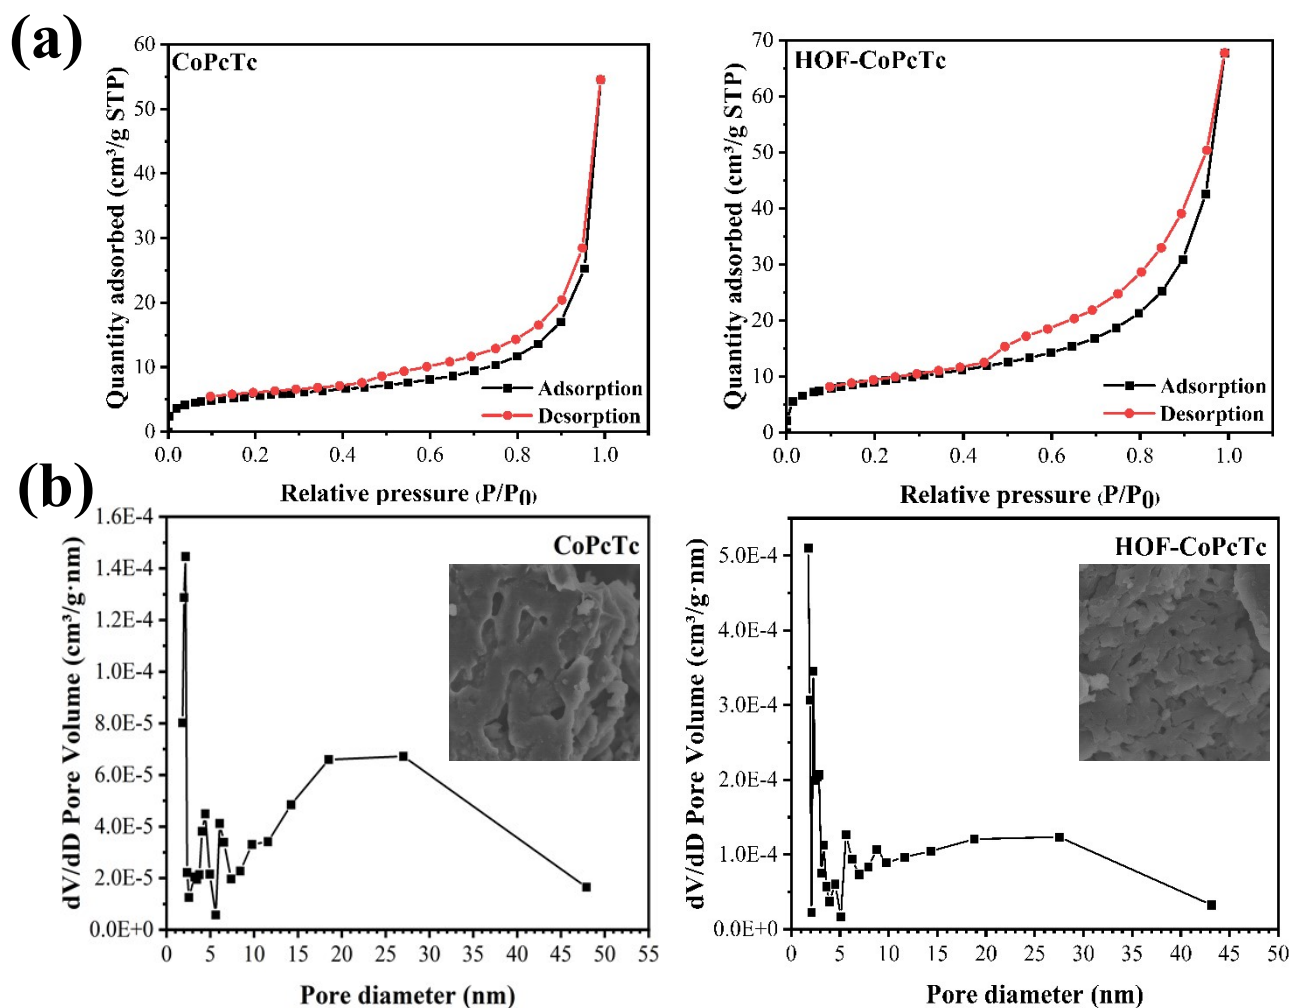

**Figure S5.** (a) N<sub>2</sub> sorption isotherms and (b) pore size distributions of the CoPcTc and HOF-CoPcTc.

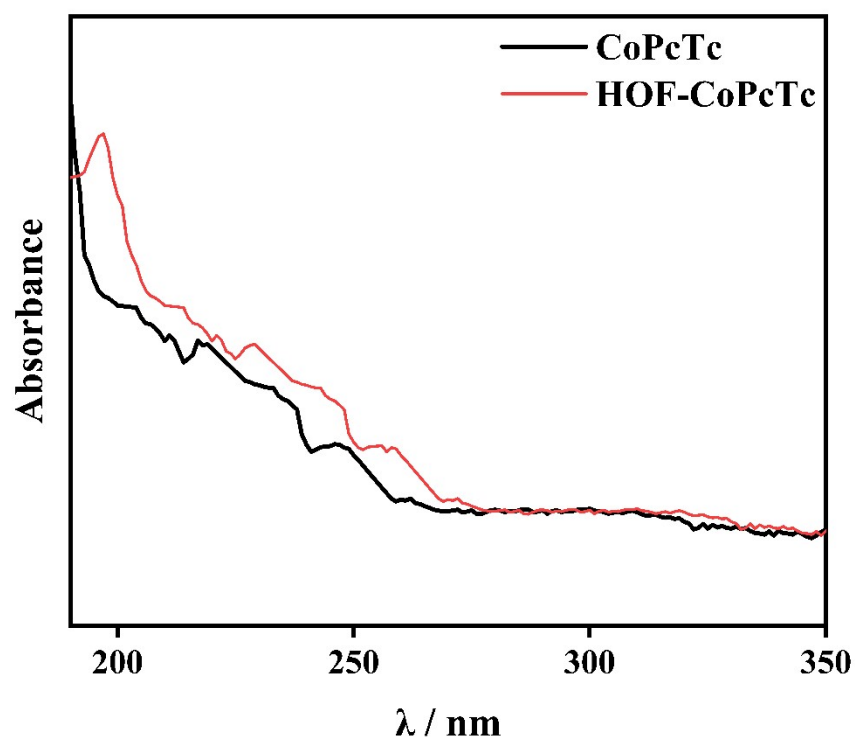

**Figure S6.** UV-vis absorption spectra for CoPcTc and HOF-CoPcTc in the CIP solution.

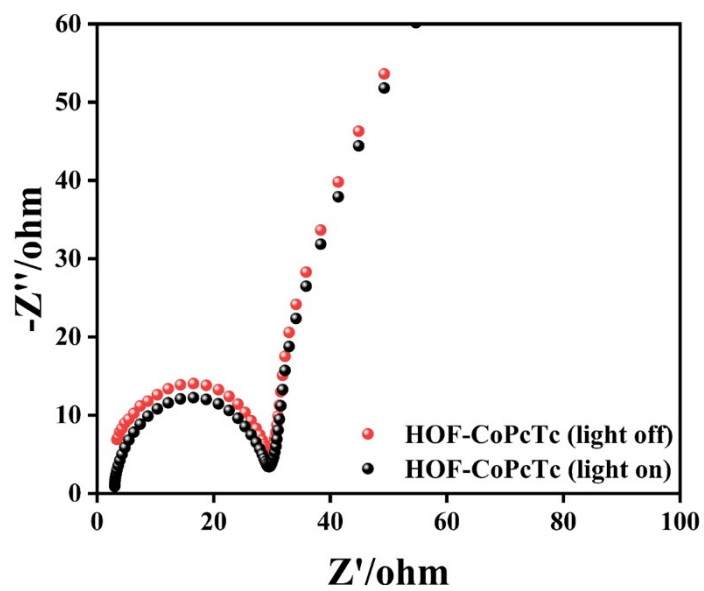



**Figure S7.** EIS Nyquist plots of HOF-CoPcTc with the light on and light off under irradiation in the light ( $\lambda > 380$  nm,  $[\text{Na}_2\text{SO}_4] = 0.1$  M)

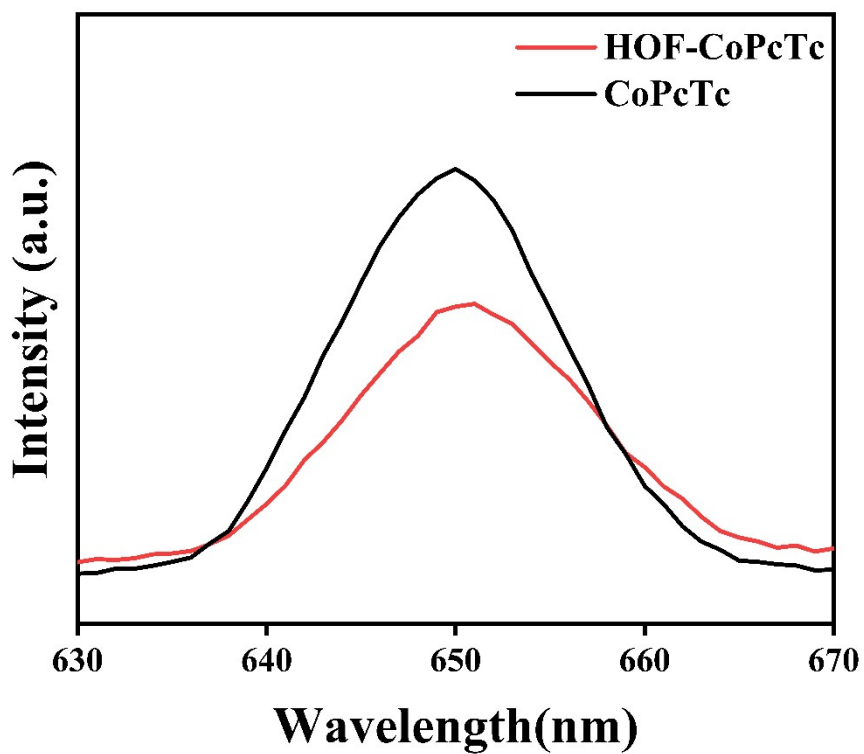

**Figure S8.** PL spectra of CoPcTc, HOF-CoPcTc.

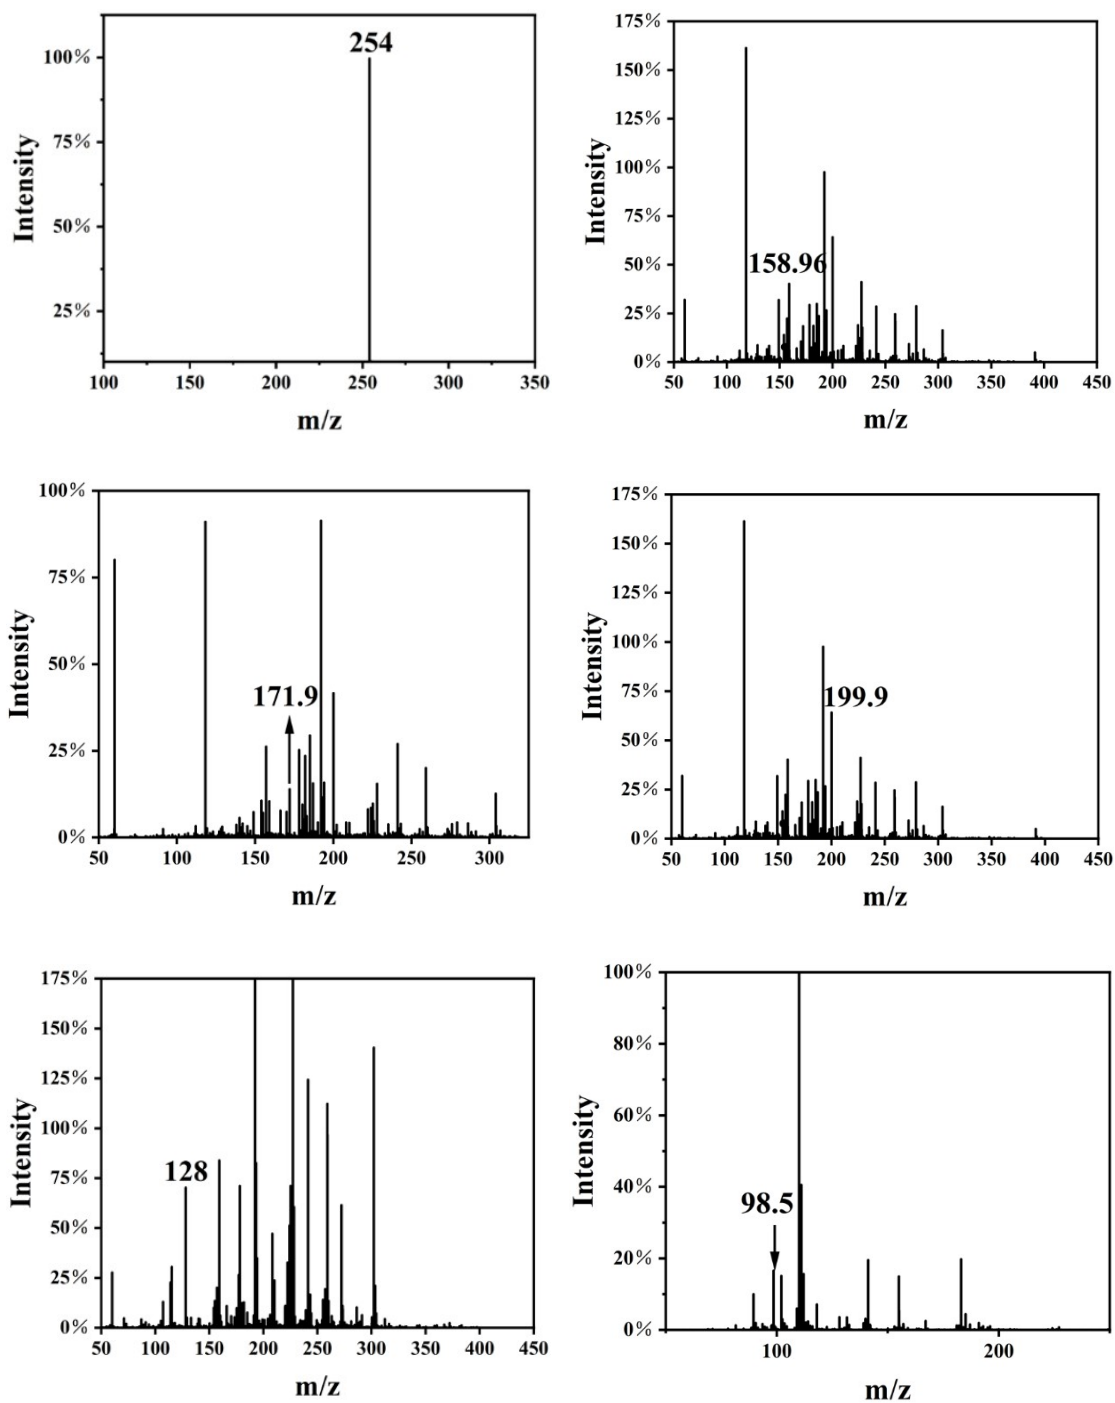

**Figure S9.** MS spectra of SMX degradation intermediates of HOF-CoPcTc.

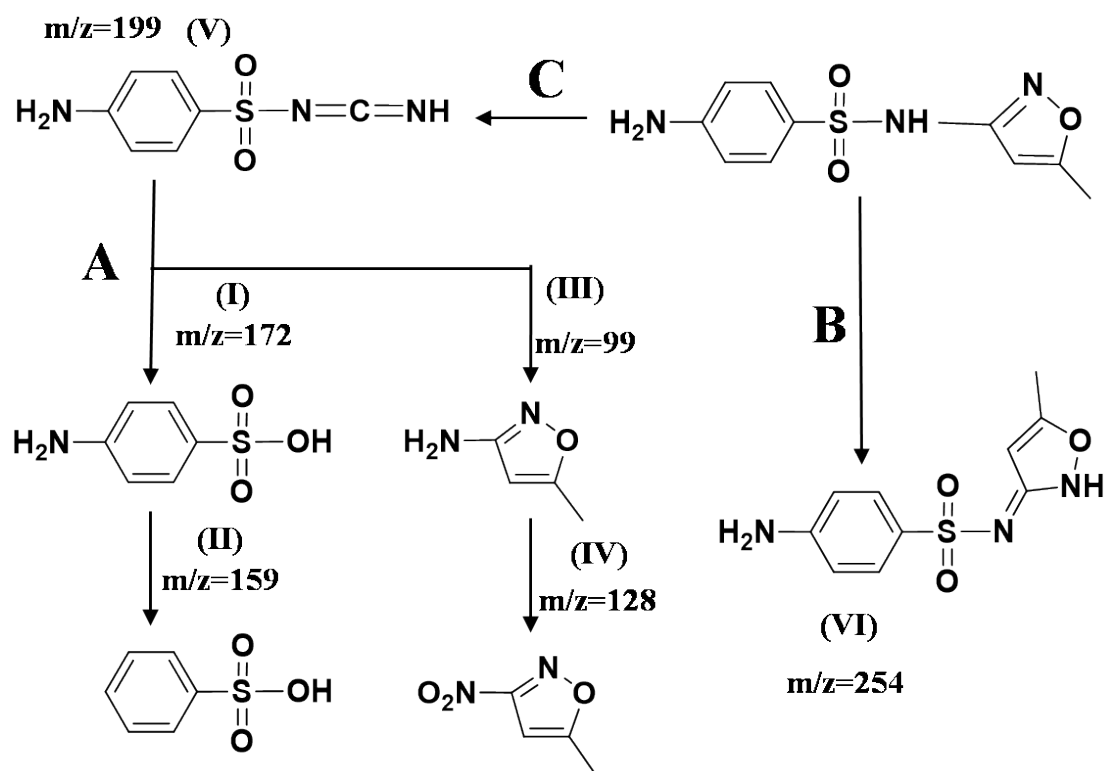

**Figure S10.** Proposed transformation pathways for SMX photocatalytic degradation.
